# Supplementary material for: Association Between Anti-CD20 Therapies and COVID-19 Severity Among Patients With Relapsing-Remitting and Progressive Multiple Sclerosis
Source: PubMed Central journal article supplement (PMC10290250; doi:10.1001/jamanetworkopen.2023.19766), 2023-06-23
Supplement: jamanetwopen-e2319766-s002.pdf [file jamanetwopen-e2319766-s002.pdf]

## Data Sharing Statement

Januel. Association Between Anti-CD20 Therapies and COVID-19 Severity Among Patients With Relapsing-Remitting and Progressive Multiple Sclerosis. *JAMA Netw Open*. Published June 23, 2023. doi:10.1001/jamanetworkopen.2023.19766

### Data

**Data available:** No

### Additional Information

**Explanation for why data not available:** Requests for access to the data reported in this paper will be considered by the corresponding author.
